# Supplementary material
Source: publisher figshare collection journal article supplement (https://acs.figshare.com/ndownloader/files/4673857)
Supplement: Supplementary file 1 [file 4673857]

**Synthesis and Properties of Phosphonic Acid Containing  
Cyanine and Squaraine Dyes for Use as Fluorescent  
Labels**

*Mark V. Reddington*

Biosearch Technologies, Inc., 81 Digital Drive, Novato California 94949

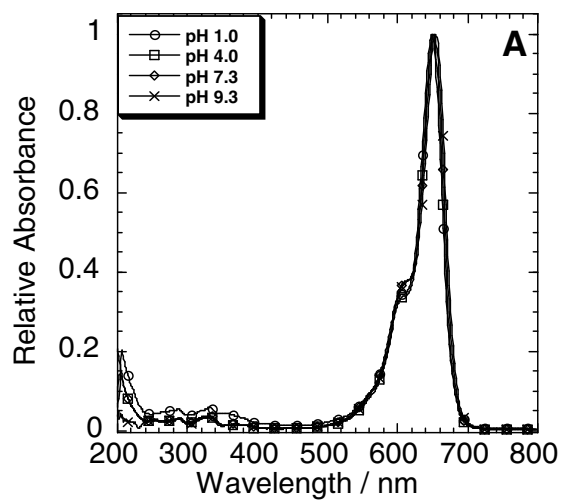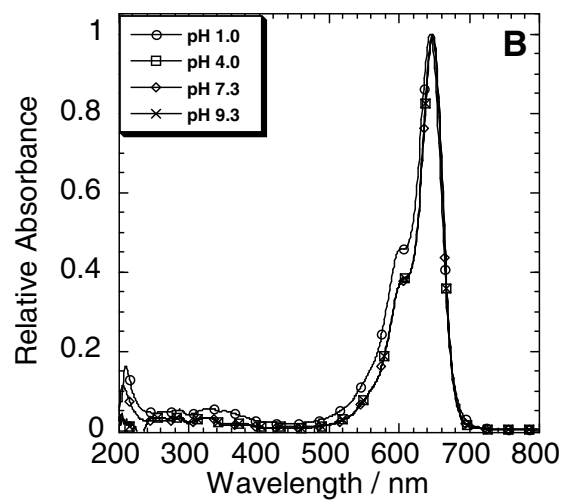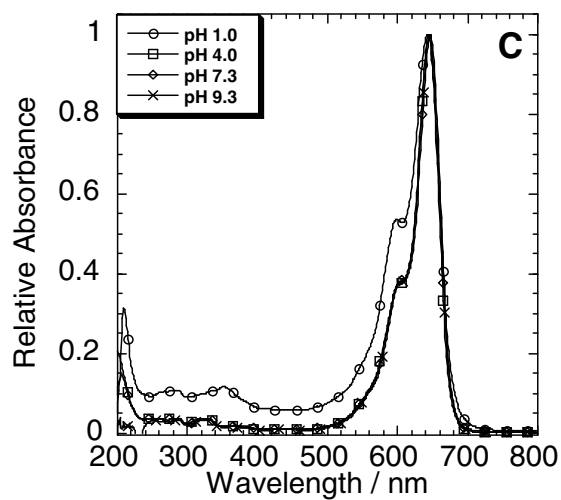

**Supplemental Figure 1.** Absorption spectra at pH 1 (circle), pH 4 (square), pH 7.3 (diamond) and 9.3 (cross) of A) **19**, B) **23** and c) **21**.

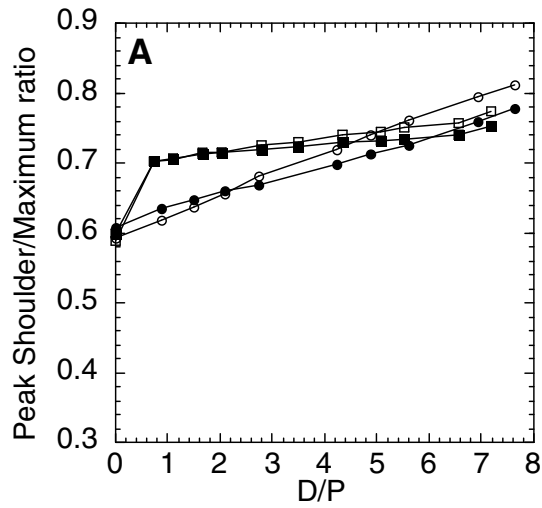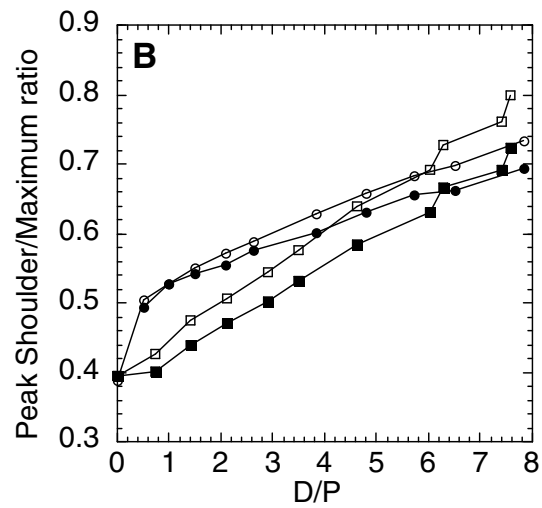

**Supplemental Figure 2.** Plots of peak shoulder to peak maximum for as a function of dye to protein ratio. (A) IgG-16 pH 7.3 (open circles), IgG-16 pH 9.3 (solid circles), IgG-18 pH 7.2 (open squares), IgG-18 pH 9.3 (solid squares) and (B) (A) IgG-21 pH 7.3 (open circles), IgG-21 pH 9.3 (solid circles), IgG-23 pH 7.2 (open squares), IgG-23 pH 9.3 (solid squares).
